# Supplementary material
Source: Royal Society of Chemistry journal article supplement (doi:10.1039/d6ma00174b)

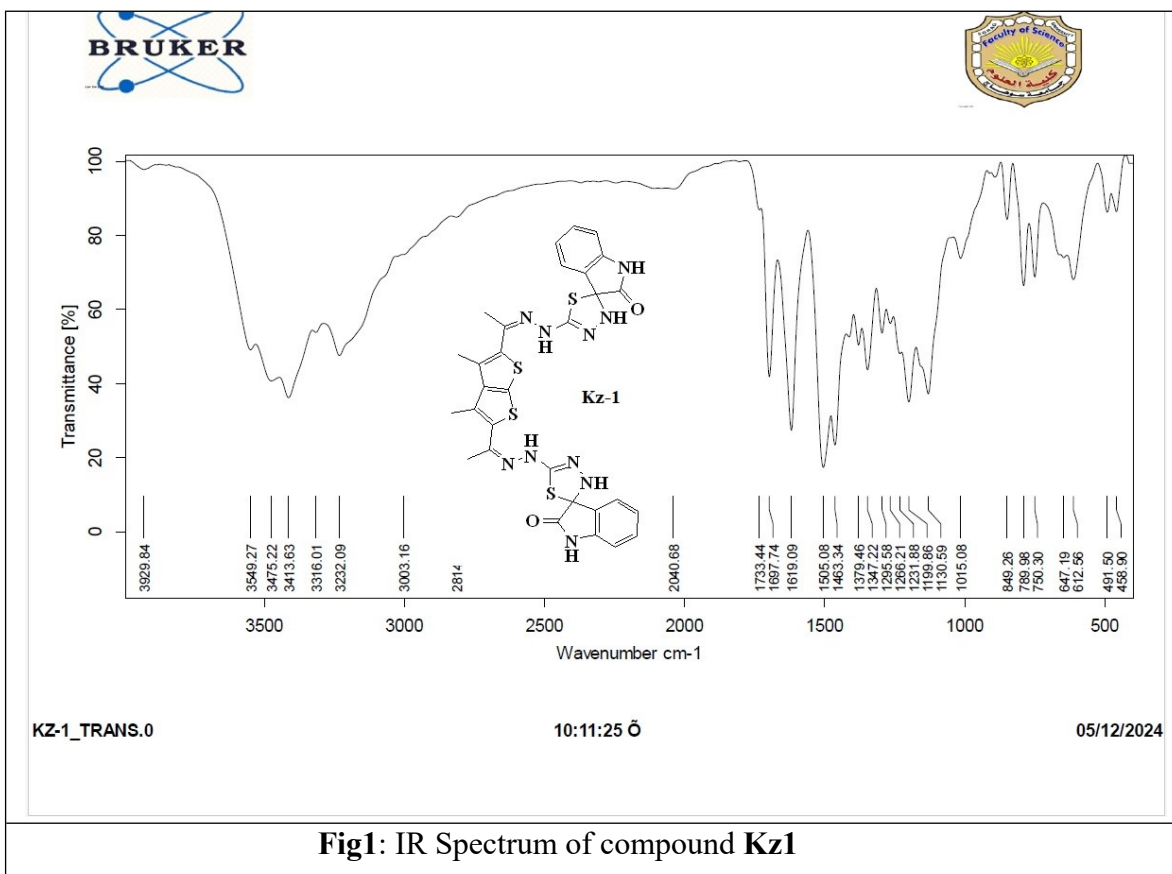

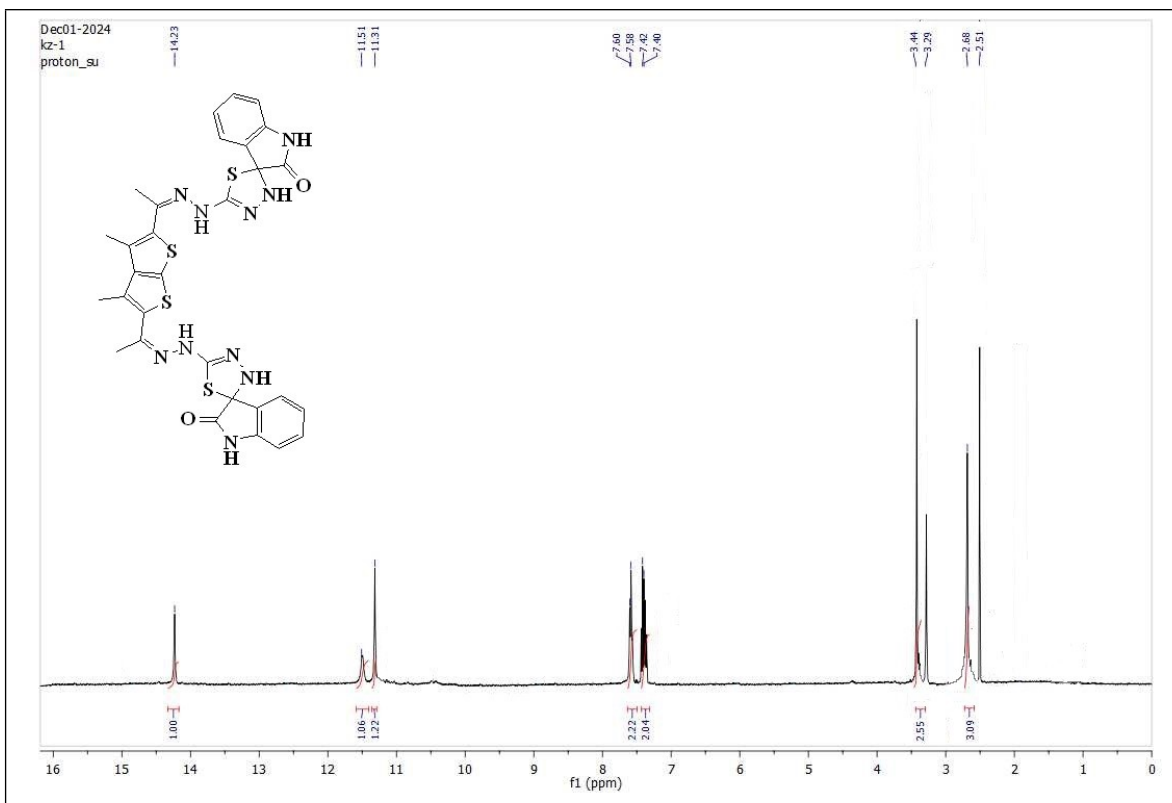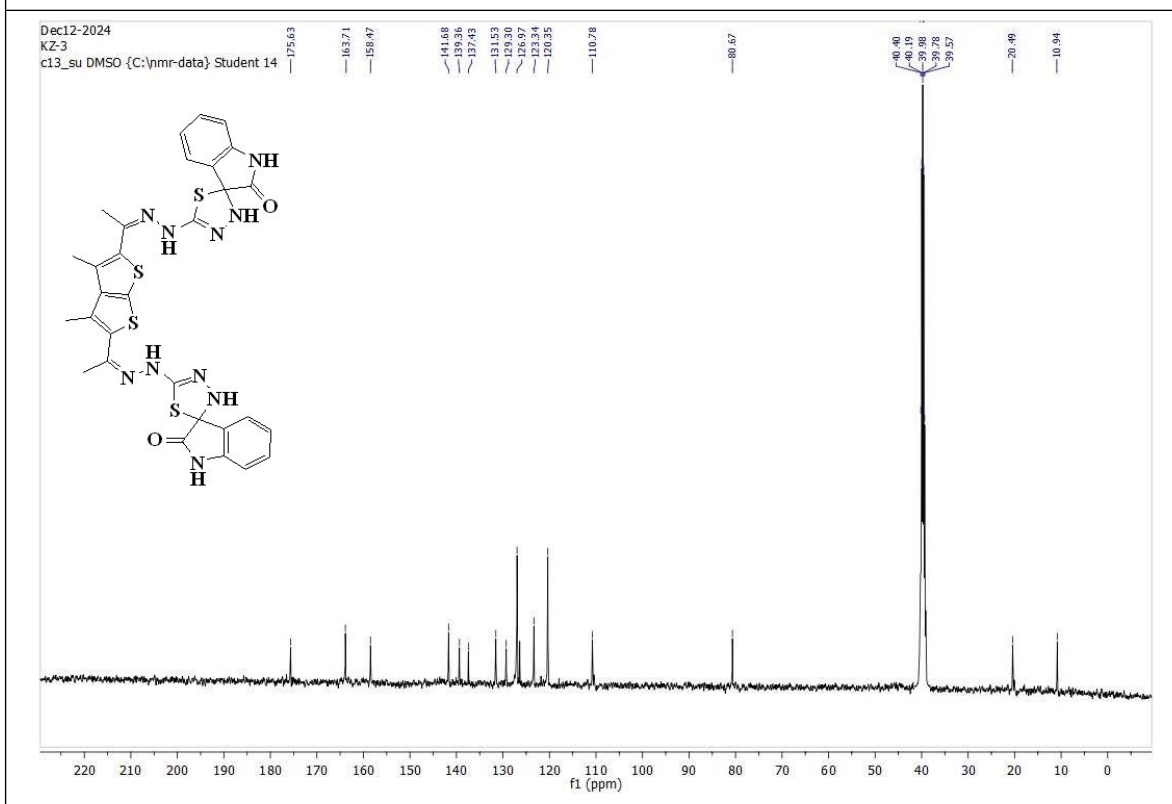

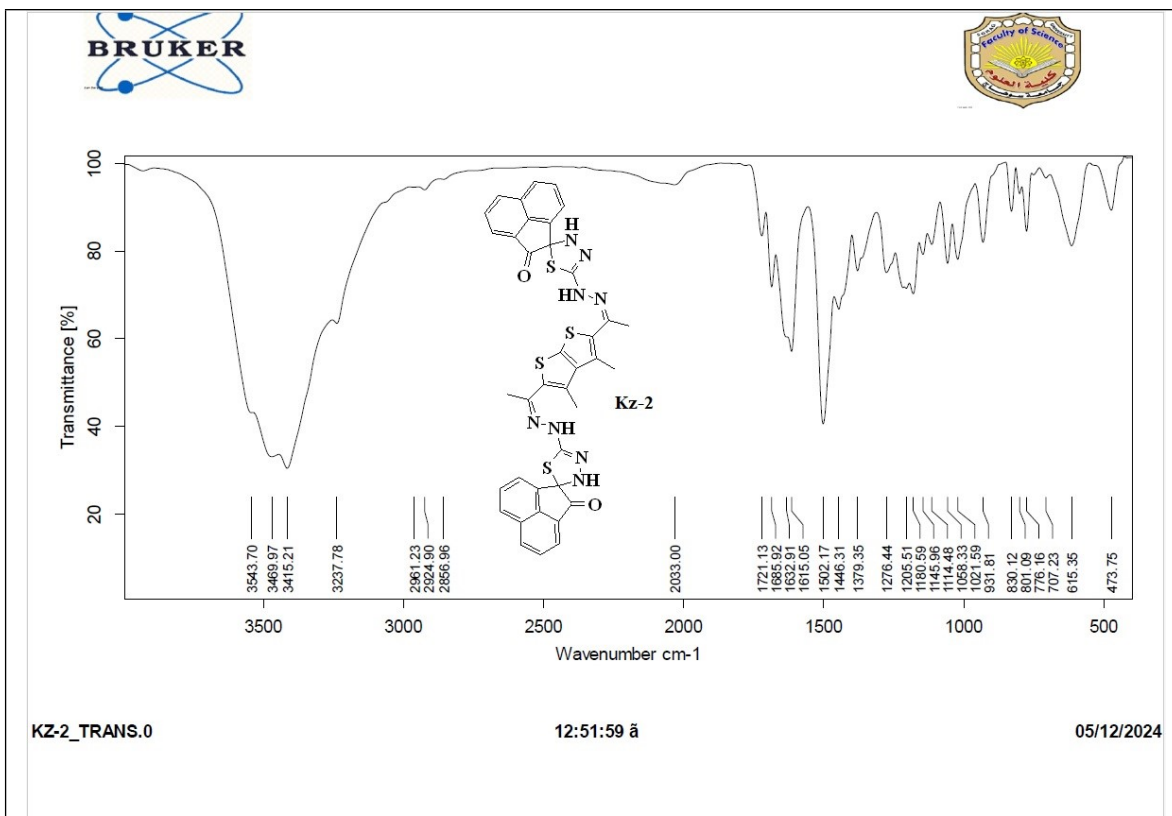

**Fig 4: IR Spectrum of compound Kz2**

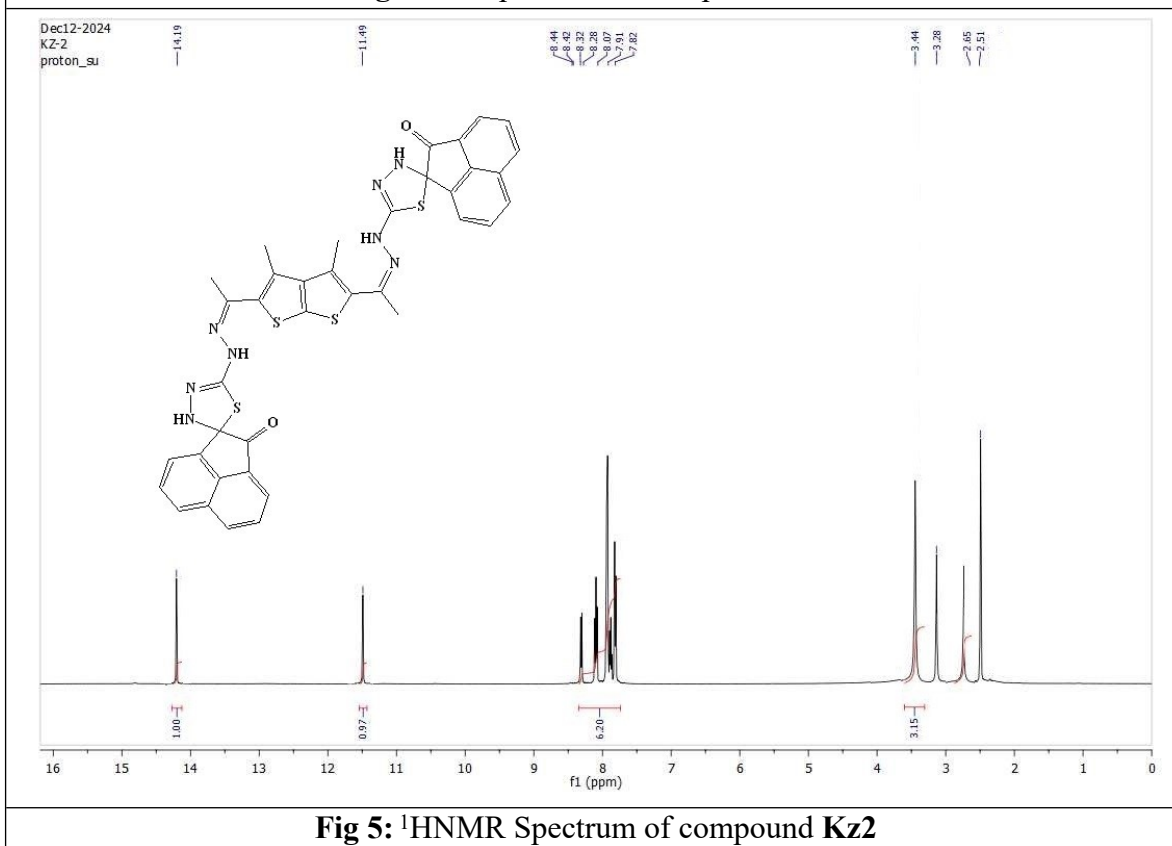

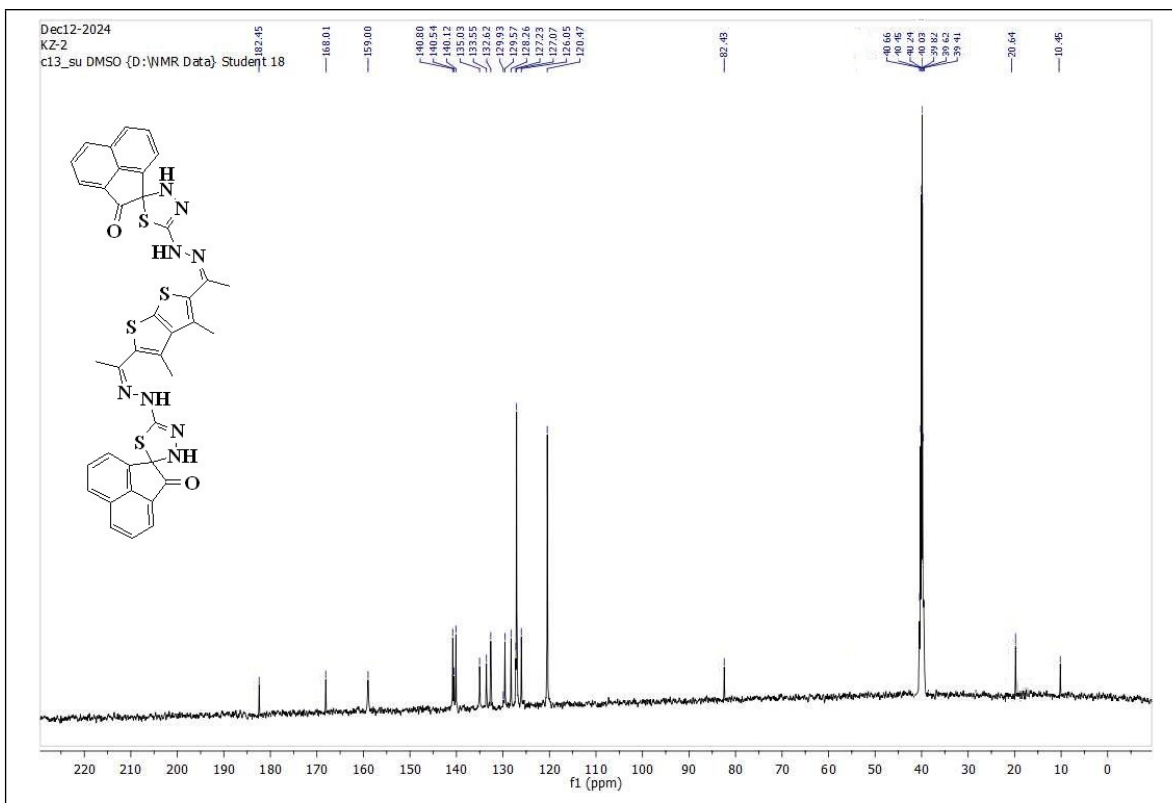

Fig 6:  $^{13}\text{C}$ NMR Spectrum of compound Kz2

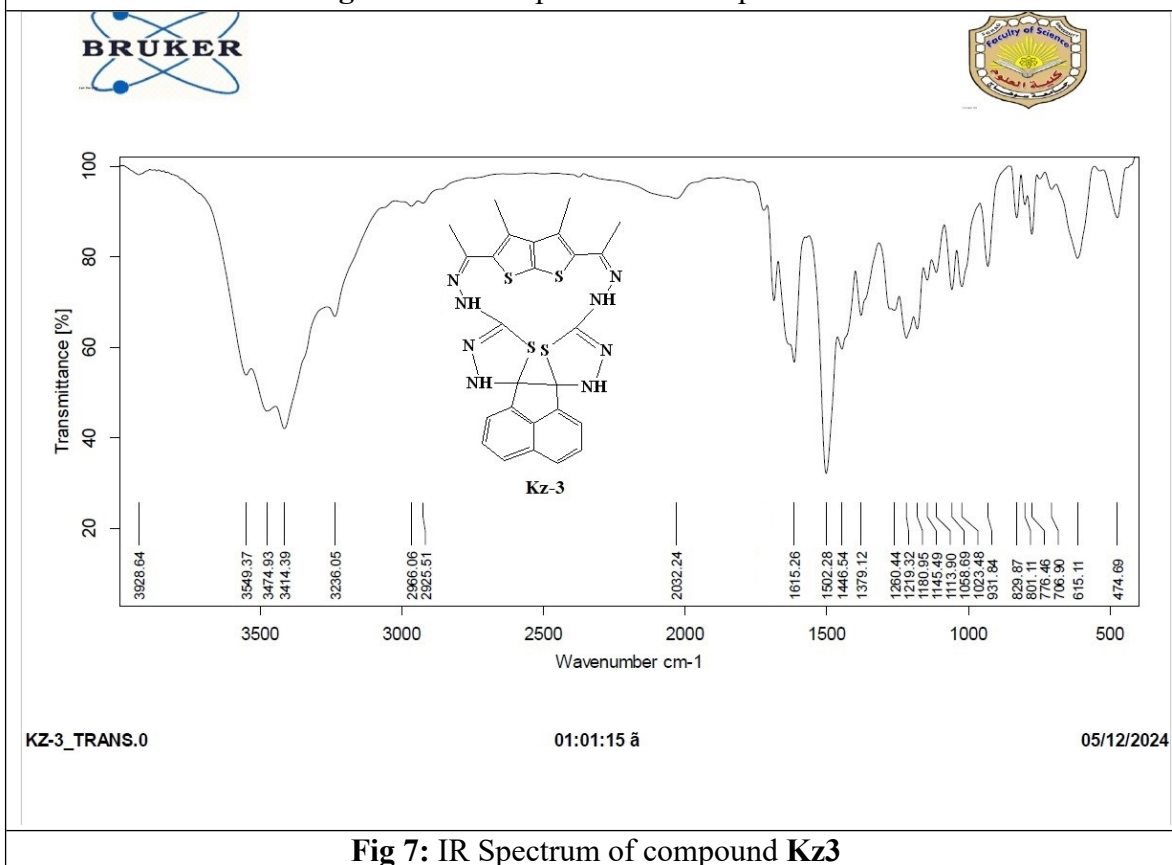

Fig 7: IR Spectrum of compound Kz3

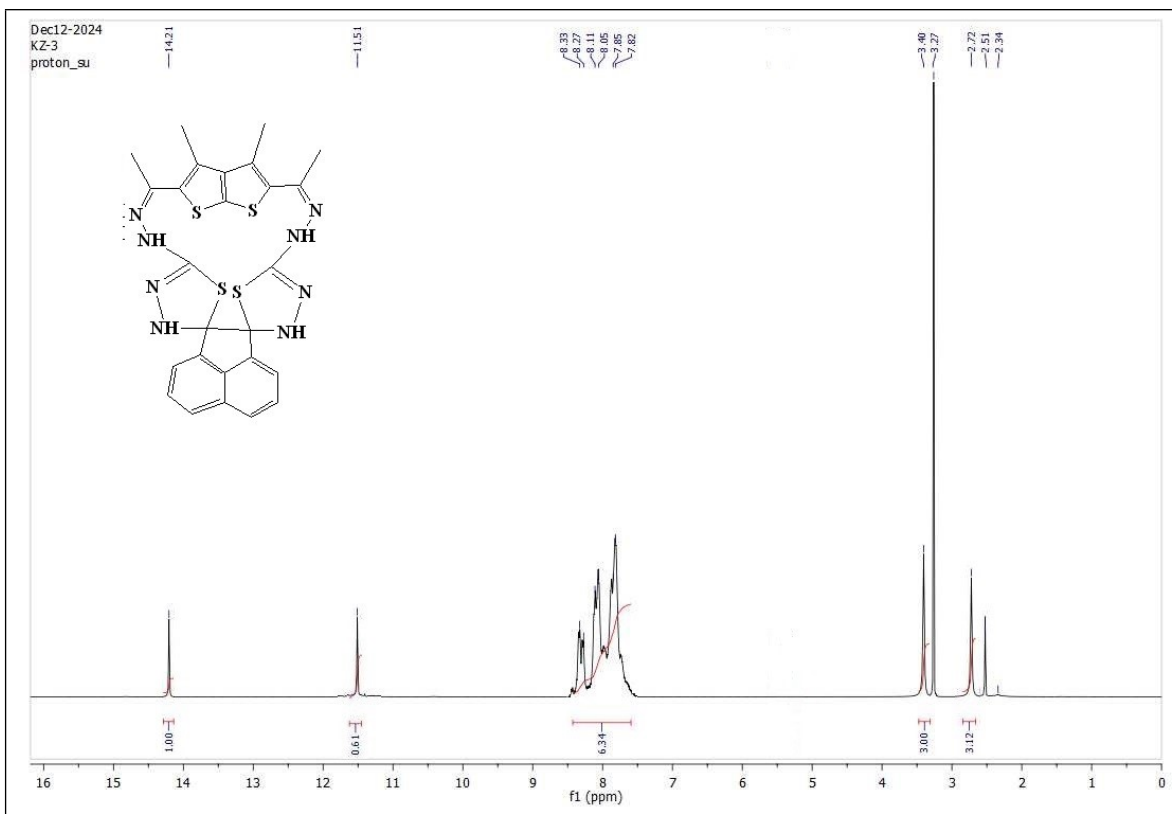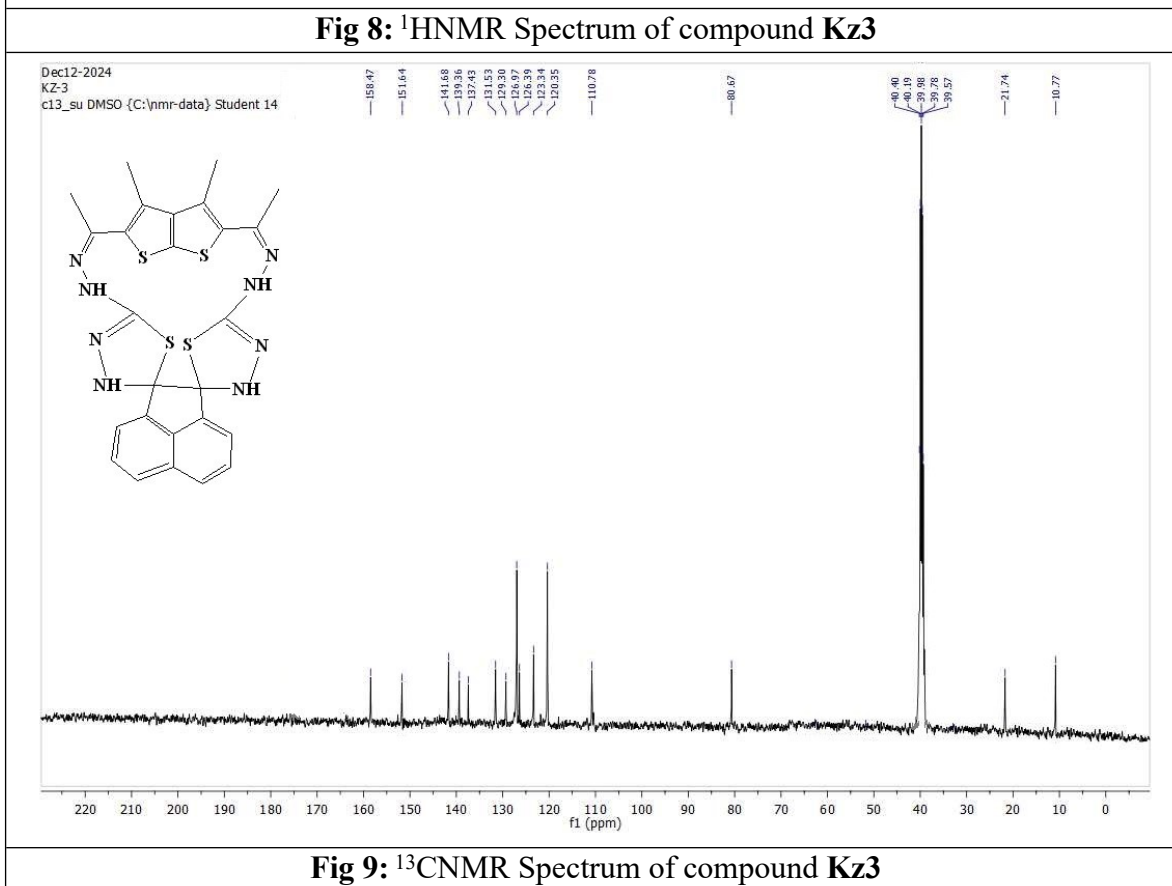

Supplement: d6ma00174b1.pdf [file d6ma00174b1.pdf]
